# Supplementary material for: Genomic Models of Short-Term Exposure Accurately Predict Long-Term Chemical Carcinogenicity and Identify Putative Mechanisms of Action
Source: PubMed Central journal article supplement (PMC4109923; doi:10.1371/journal.pone.0102579), 2014-07-24
Supplement: pone.0102579.s001.pdf [file pone.0102579.s001.pdf]

# Genomic models of short-term exposure accurately predict long-term chemical carcinogenicity and identify putative mechanisms of action

Daniel Gusenleitner, Scott S. Auerbach, Tisha Melia, Harold F. Gómez, David H. Sherr, Stefano Monti

## Supplementary Document

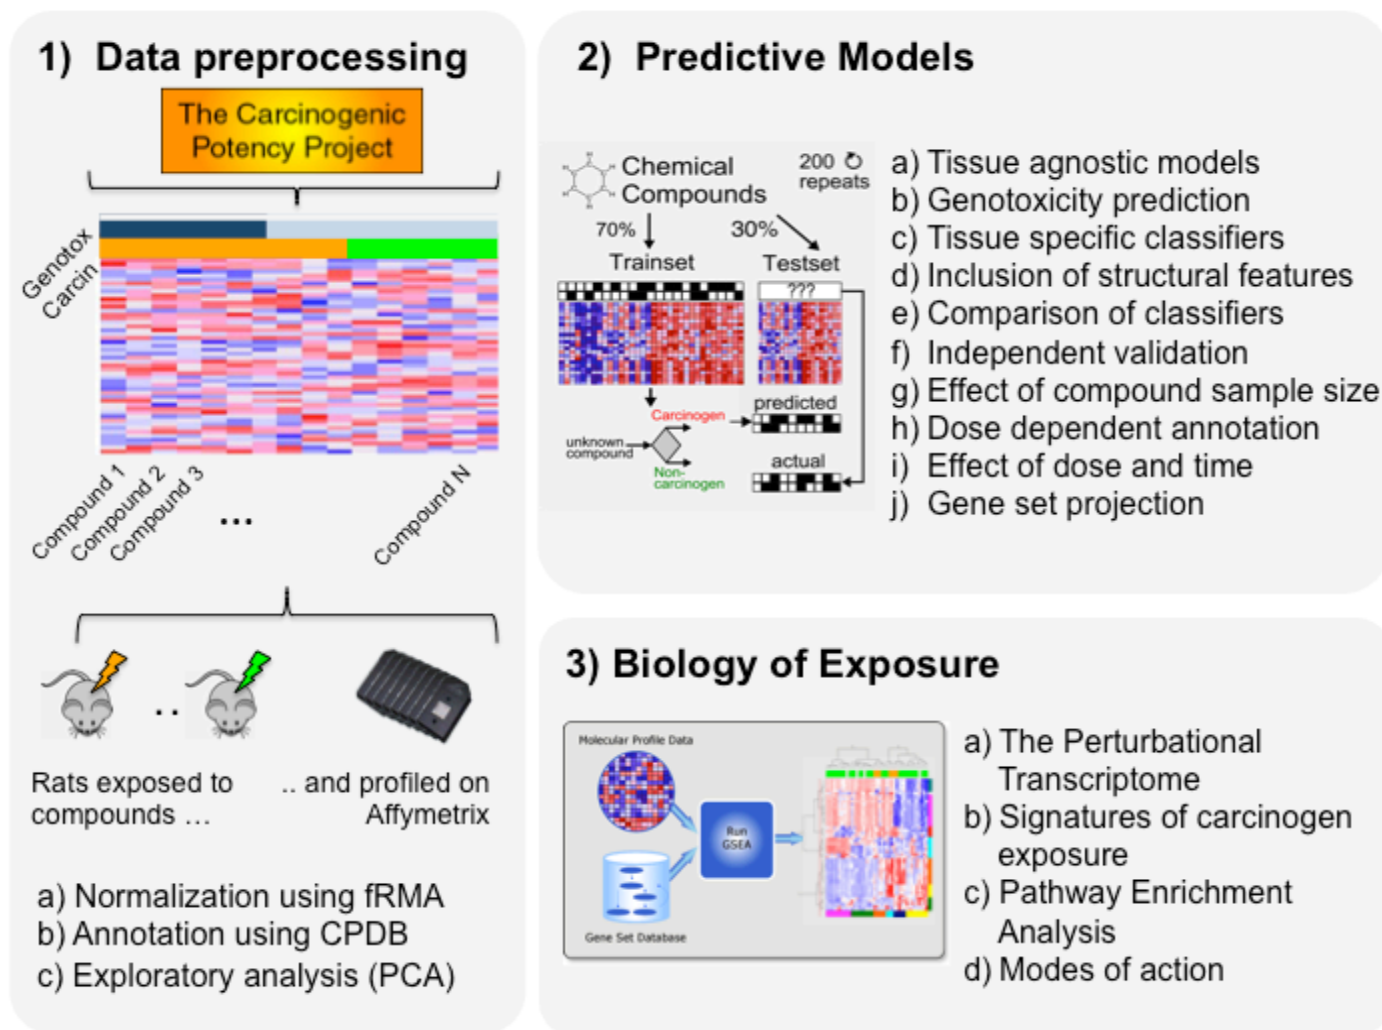

**Figure S1: Overview of the analysis.** The study presented here consists of three parts: 1) Preprocessing, annotation and exploration of the data. 2) Building classification models to predict carcinogenicity in rats, which includes the investigation of the effects of dose-, time-, and tissue-specificity, effects of sample size, and others. 3) Biology of exposure, where we defined carcinogenicity signatures, investigated enriched pathways and derived putative modes of action.

## Discussion

**Cost-benefit analysis.** If we assume that about 10% of the 84,000 chemicals currently in commercial use are carcinogens [16], classification of the complete set based on our classifier optimized on a 1:1 FP/FN cost function would yield approximately 4400 predicted carcinogens – of which 1285 would be expected false positive (based on the sensitivity/specificity as assessed by training on DM and testing on TGG, see Figure 3) – and about 5200 carcinogens would be missed (FN). If we wished to reduce the number of FPs to 500,

corresponding to a specificity of ~99.3%, this would translate into a sensitivity of ~20.9%, and lead to the detection of 1756 out of the expected 8400 true carcinogens. Conversely, adopting a 1:2 FP/FN cost function would lead to an increased sensitivity of 88.4% and a drop in specificity to 36.3%. These scenarios are presented to show the considerable flexibility afforded by the classifier, and to emphasize that the appropriate specificity/sensitivity trade-off will be determined by the main purpose for which the classifier is used. If its primary purpose is to prioritize compounds for further screening, a high sensitivity (few FNs) would be preferable, even at the cost of a lower specificity (more FPs). On the other hand, if its purpose is to prove conclusively that a compound is carcinogenic (e.g., for regulatory purposes), then increasing the specificity even at the cost of a lower sensitivity might be preferable.

**Structural features as predictors.** Evaluation of the relative predictive power of gene expression and chemicals' structural features conclusively shows the higher information content of the former over the latter, but also shows that augmenting the prediction models with such structural information marginally improves classification, in particular genotoxicity. The top structural features as ranked by the Random Forest variable importance include chloride.p.alkyl, halde..p.alkyl, nitrosamine, nitrose and benzene.1.alkyl.4.carbonyl, among others, which enable compound-DNA interaction and consequently are predictive of genotoxicity. Since the 3D structural features are easily accessible for most compounds, it seems sensible to incorporate these in any future classifier.

## **Material**

For the Gene set enrichment analysis as well as the projection into pathway space we used the gene sets of the canonical pathways in the second compendium of the molecular signature database (MSigDB) [40] version 3.0, which includes 880 gene sets. All gene sets were mapped from human gene symbols to rat Ensembl gene identifiers using the R/Bioconductor package `BiomaRt`.

For the DrugMatrix, each compound is annotated with 1,902 dichotomous chemical structure descriptors extracted from the Leadscope Enterprise 3.0 software package (Columbus, Ohio). All samples were profiled on the Affymetrix Rat 230.2 microarray.

## **Methods**

**Exploratory analysis** - In order to reduce the dimension of the dataset and have a 2 or 3-dimensional representation of the dataset we used Principal Component Analysis (PCA) using the R package `prcomp` and Multidimensional Scaling (MDS) using the R package `ggplot2`.

**Defining the Perturbational Transcriptome** The list of genes that significantly respond to chemical perturbation was identified by carrying out a two-group moderated t-test between the control samples and the corresponding treatment samples *for each* compound (at a given dose) separately, while correcting for the confounding effect of time. Only the genes with FDR-corrected q-value  $\leq 0.01$  and fold-change  $\geq 1.5$  (in either direction) in at least five compounds were included. A gene-by-compound matrix was then constructed, with each column representing the vector of "control vs. treatment" t-scores for the corresponding compound. A total of 191 compound-dose instances, corresponding to 138 distinct compounds for which either carcinogenicity or genotoxicity information was available, were included in this analysis. Hierarchical clustering of both the compounds and the genes based on the t-scores' matrix was performed, and the results visualized in a heatmap with the color-coding based on the t-test's q-values and the direction of the up-regulation (Figure 2a). The procedure yielded a clear two-cluster stratification, with one of the clusters highly enriched for carcinogenic compounds. Association between cluster membership and carcinogenicity (genotoxicity) status of the compounds was assessed by Fisher test.

Each gene was tested for its association with carcinogenicity, by performing a Fisher test between the gene status (0: not differentially expressed; 1: differentially expressed) and the compound status (+: carcinogenic; -

: non-carcinogenic) across compounds, and the nominal p-values were corrected for multiple hypothesis testing by the FDR procedure (Figure 2b, columns grouped under 'Enrichment').

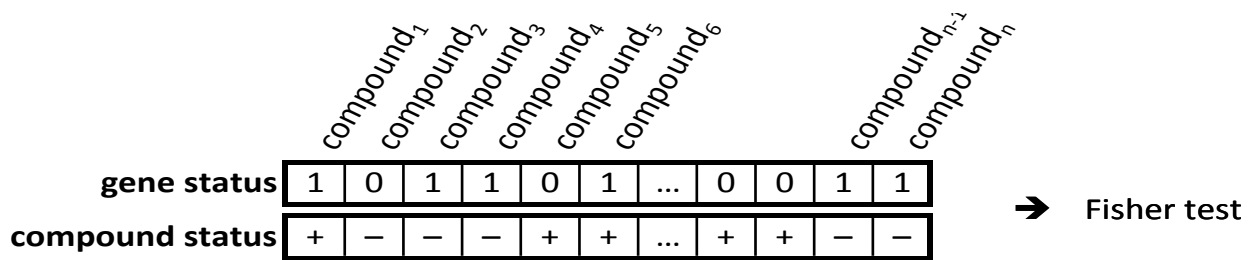

To test whether the number of genes up-/down-regulated by each compound was significantly higher in carcinogens than in non-carcinogens, a Kolmogorov-Smirnov test was performed as shown in Figure S2. The test evaluates whether the distribution of carcinogenic compounds is significantly skewed toward either ends of the list of compounds sorted according to the number of genes they up-/down-regulate. The results show a significant over-representation of carcinogenic compounds toward the high-end of the sorted list.

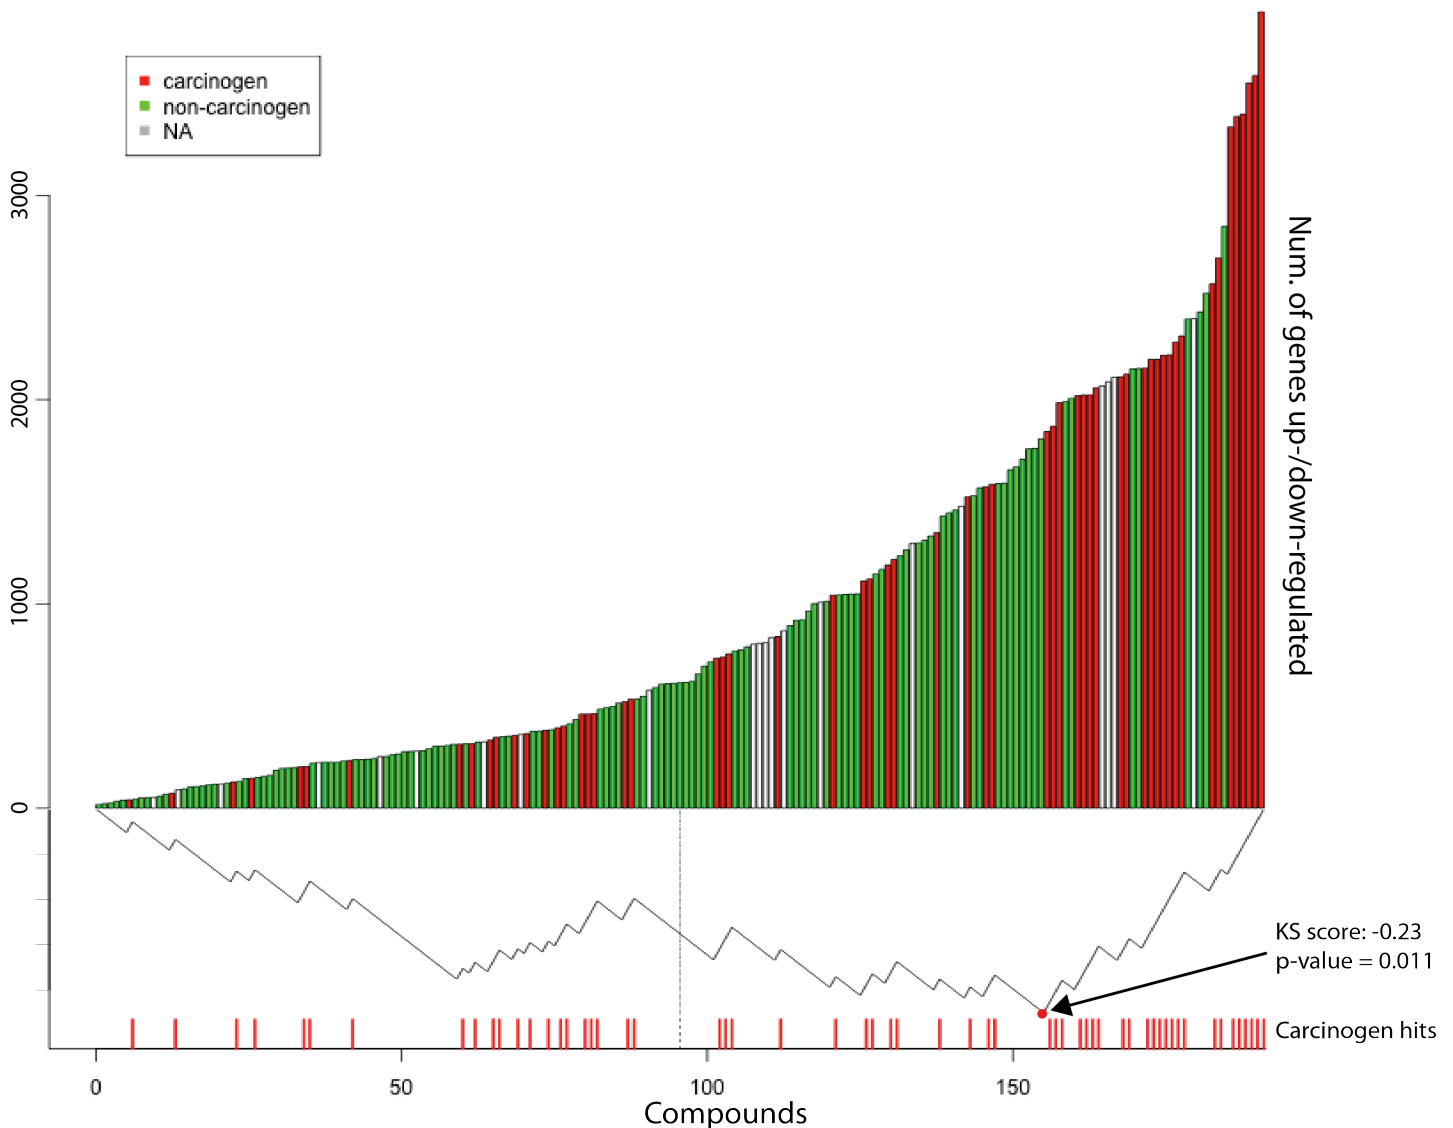

**Figure S2:** Distribution of number of up-/down-regulated genes across compounds. The carcinogenic compounds (red ticks) are significantly skewed toward the right-end of the distribution, as measured by a KS test (bottom).

**Tissue-agnostic carcinogenicity classifiers** We first assessed whether it is possible to predict the carcinogenicity of a compound independent of the tumor site. To this end, Random Forest classifiers were built from the DrugMatrix liver samples using tissue agnostic carcinogenicity labels, whereby a compound is labeled as carcinogenic if it is found to induce cancer in any tissue type at any dose. The random resampling-based estimation of classification performance yielded an AUC of 64.8% when predicting carcinogenicity in this fashion (Table S1 and corresponding ROC curves in Figure S3).

**Mode of Action Figure** For Figure 6b we used the top 50 pathways as ranked their variable importance for classifying the carcinogenic potential of a chemical compound. The pathways as well as the chemical compound were grouped using hierarchical clustering. In order to acquire the driving genes for each cluster or mode of action we clustered the chemical compounds only in the space of the pathways of a given mode of action. We then split these hierarchical clusters in two groups at the top node of the dendrogram and went back to the actual gene expression data for these two groups, where we performed differential gene expression analysis (limma) between those groups in order to get a gene ranking. We then reduced the list of genes to those that are present in any of the pathways that defined a given mode of action and reported the top ranking genes (Figure 6c – right column).

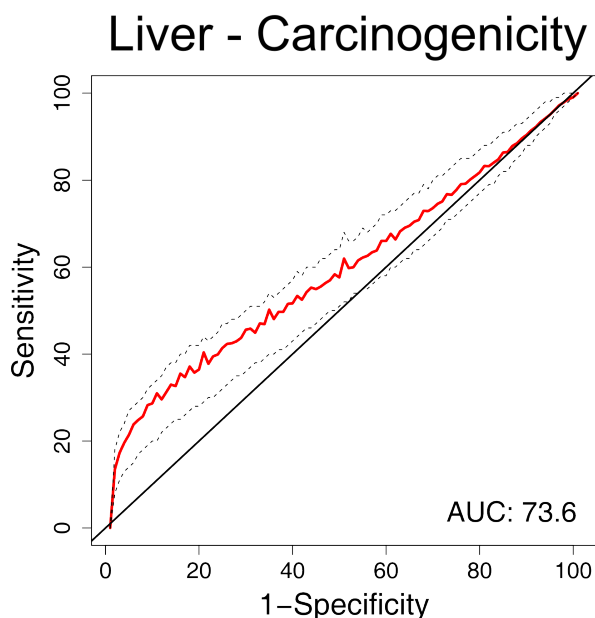

**Figure S3 – Tissue-agnostic carcinogenicity prediction** ROC curves corresponding to random forest classifiers trained on liver samples but using tissue-agnostic carcinogenicity labels. The red curves show the means over 200 iterations of a 70%/30% train/test dataset split, whereas the dashed curves indicate the first and third quartiles respectively.

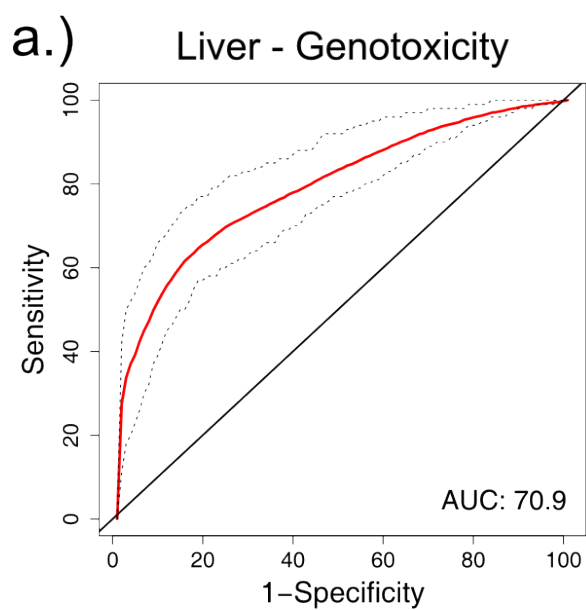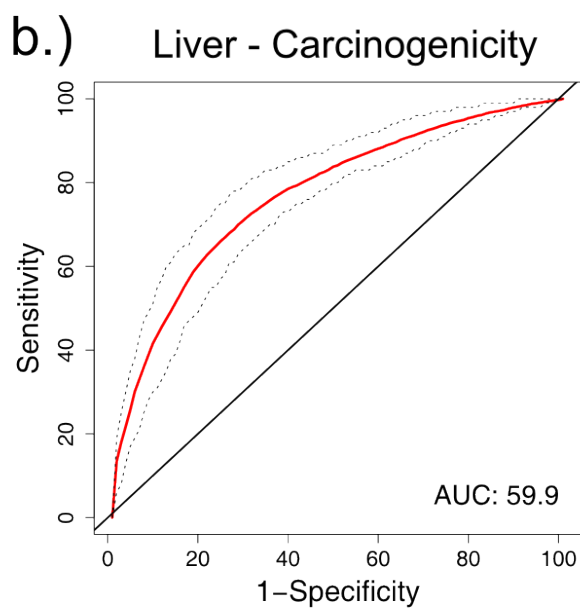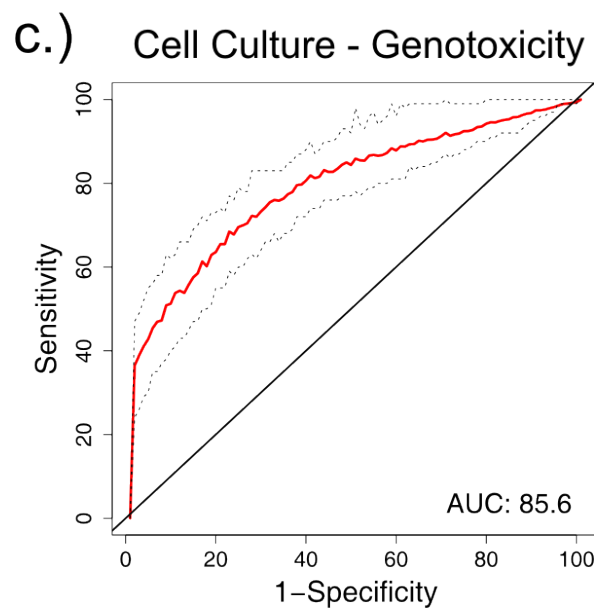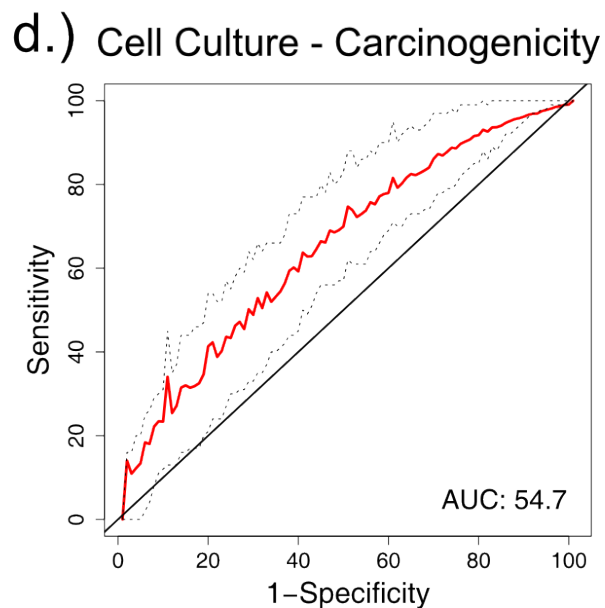

**Figure S4 – Prediction based on chemicals’ structural features** ROC curves corresponding to random forest classifiers using chemicals’ structural features as predictors. The red curves show the means over 200 iterations of a 70%/30% train/test dataset split, whereas the dashed curves indicate the first and third quartiles respectively.

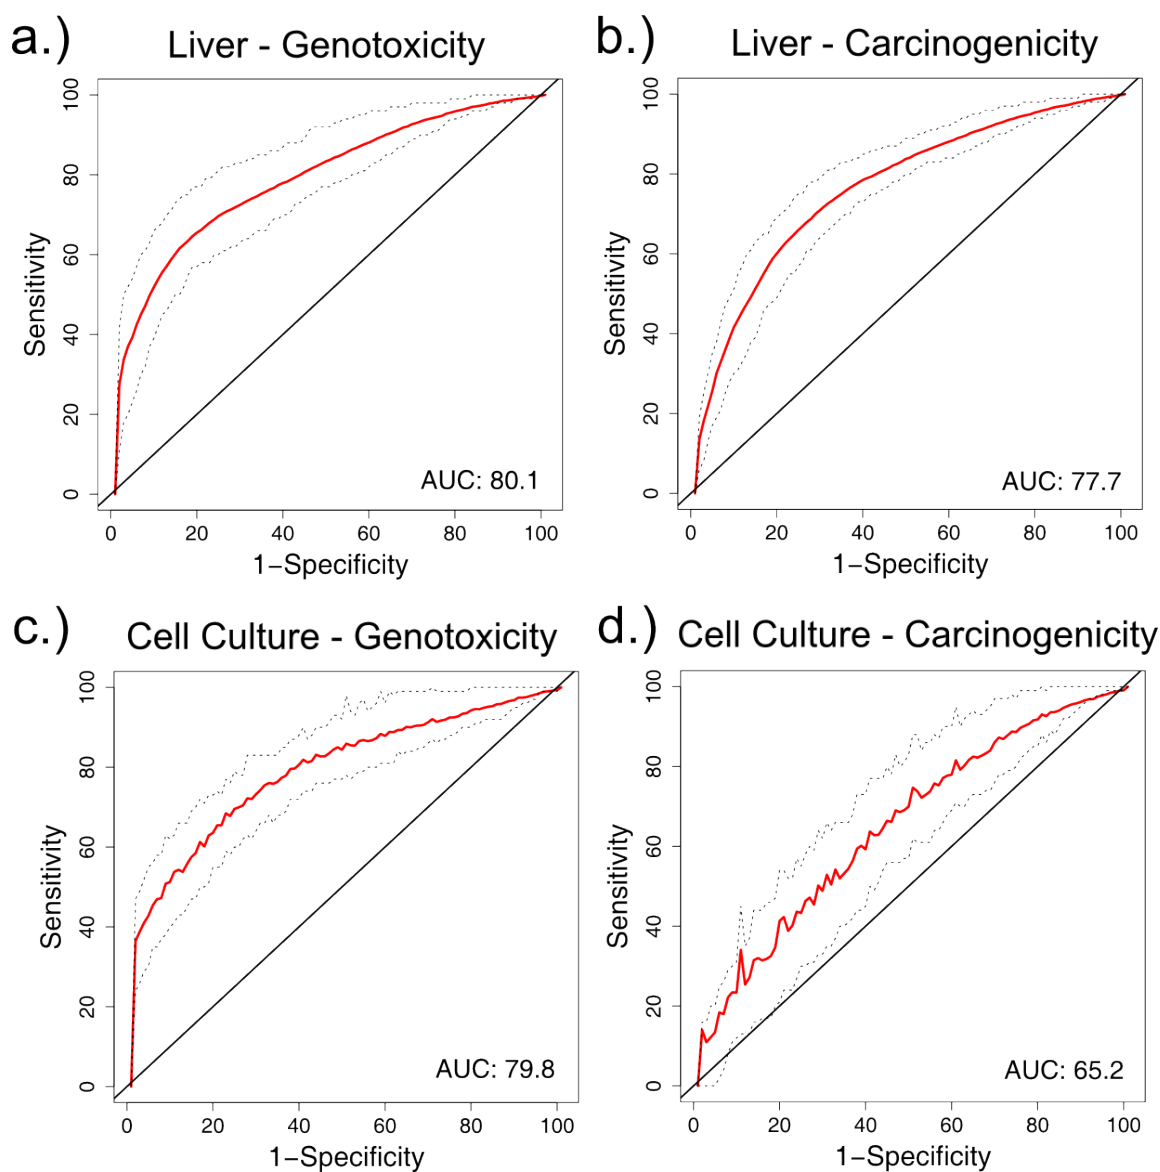

**Figure S5 – Prediction based on gene expression and chemicals’ structural features** ROC curves corresponding to random forest classifiers using the expression of the 500 genes with highest variance *and* chemicals’ structural features as predictors. The red curves show the means over 200 iterations of a 70%/30% train/test dataset split, whereas the dashed curves indicate the first and third quartiles respectively.

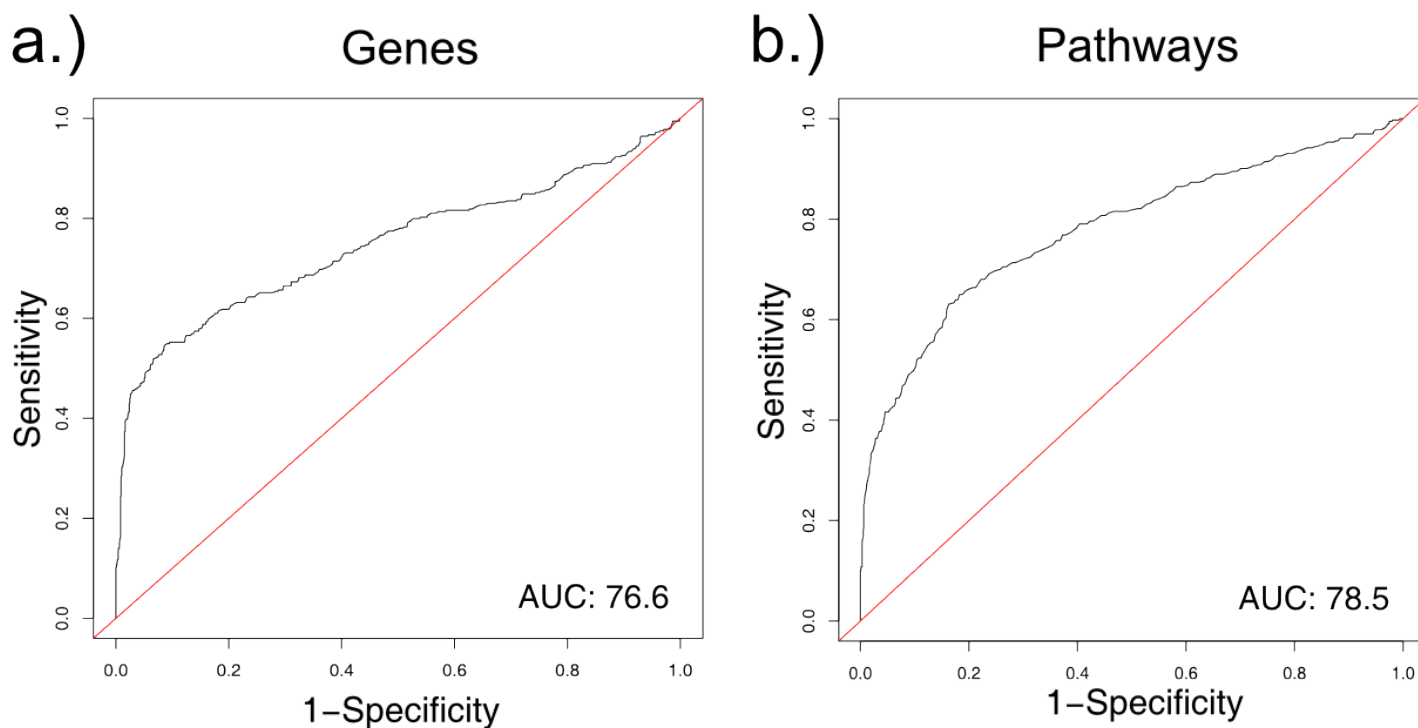

**Figure S6 – ROC of models trained on the DrugMatrix and tested on TG-GATEs** We trained a prediction model on all liver samples in the DrugMatrix and predicted the class labels of samples in the TG-GATEs treated with chemicals not included in the DrugMatrix. **a)** ROC curve for the gene-based predictions and **b)** ROC curve for the pathway-based predictions (see Methods).

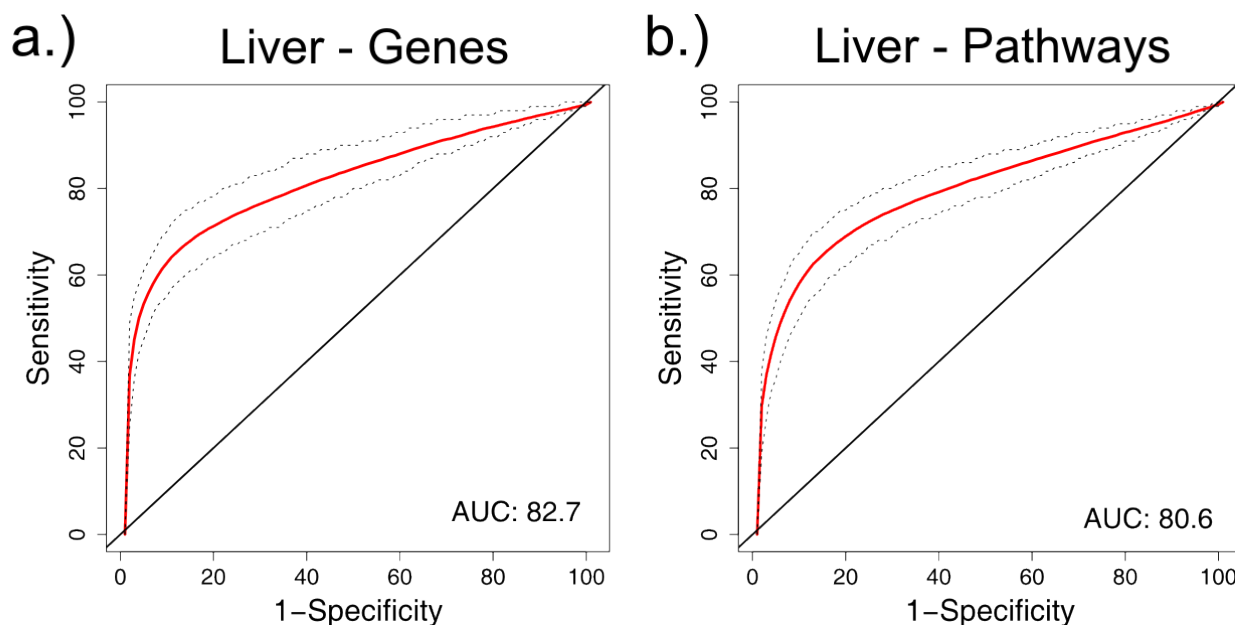

**Figure S7 – ROC of TG-GATEs cross-validation tests** ROC curves corresponding to random forest classifiers trained and tested on TG-GATEs. The train/test split was repeated 200 times to get estimates on the 95% confidence interval. **a)** results of the gene-based predictions and **b)** results of the pathway-based predictions (see Methods). The red curves show the means over 200 iterations of a 70%/30% train/test dataset split, whereas the dashed curves indicate the first and third quartiles respectively.

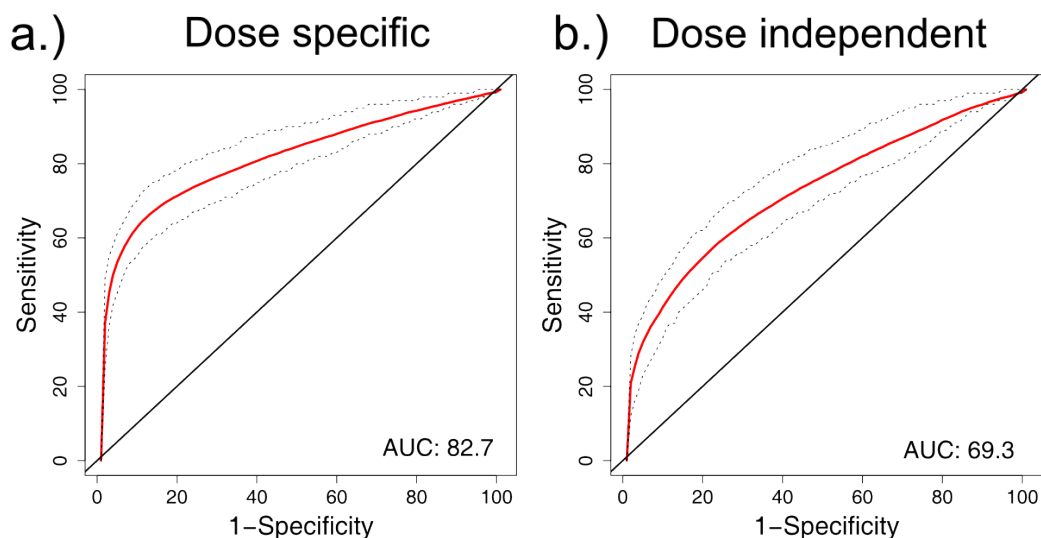

**Figure S8 – Effect of dose dependence on prediction ROC curves** corresponding to random forest classifiers trained on **a)** dose-specific carcinogenicity labels; and **b)** dose-independent carcinogenicity labels. For the dose-independent labels we used the annotation at the maximum dose and used it for all other doses. The red curves show the means over 200 iterations of a 70%/30% train/test dataset split, whereas the dashed curves indicate the first and third quartiles respectively.

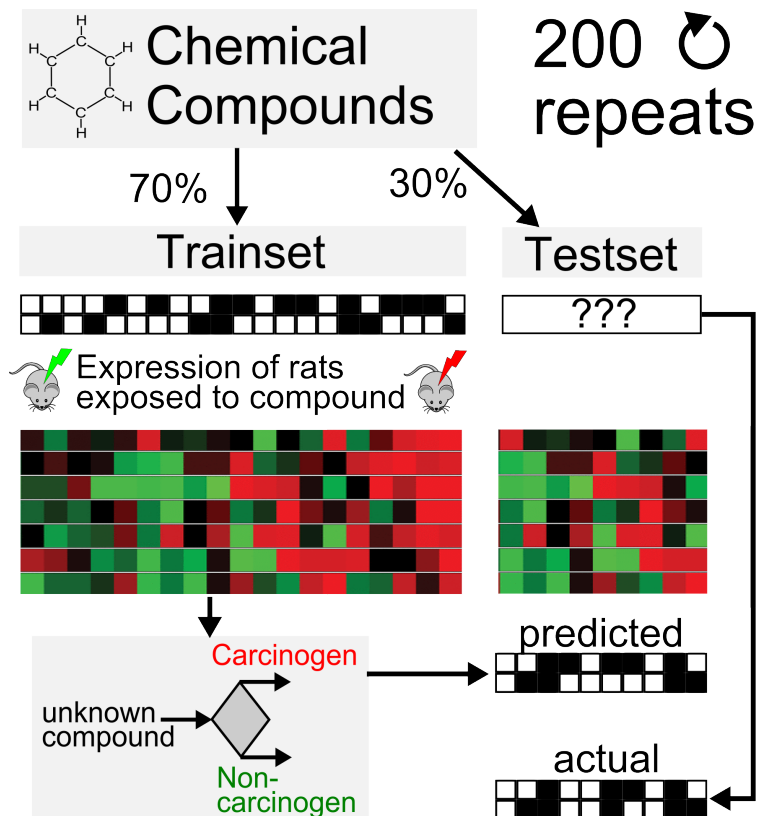

**Figure S9 – Random resampling scheme** – Chemical compounds are split into a 70% training set and a 30% test set (stratified with respect to the phenotype to be predicted). The gene expression profiles associated with the training set are then used to train a classification model, which is used to predict the class labels of the test set. The predicted class labels are then compared with the actual labels and the prediction performance (AUC) can be evaluated. To achieve a robust evaluation and get an estimate of the standard error the random 70%/30% split is repeated 200 times.



# Geneset Projection

increasing interpretability and robustness

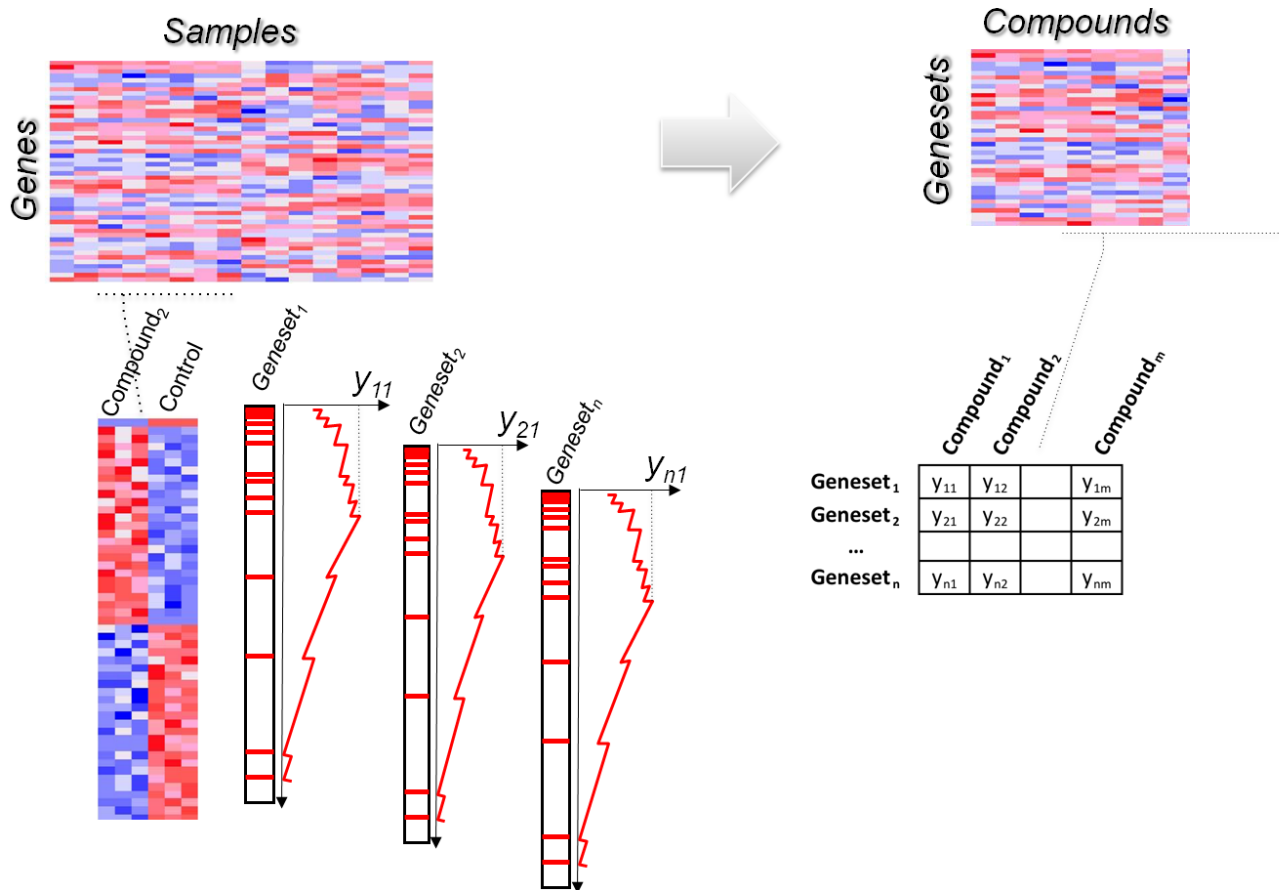

**Figure S10 - Overview gene set projection** For each compound, a vector of  $n$  gene set enrichment scores were computed based on the “Compound vs. control” phenotype, where  $n$  is the number of gene sets. The original matrix of gene-by-compound is thus transformed into a gene set-by-compound matrix.

● genotoxic    ● non-genotoxic

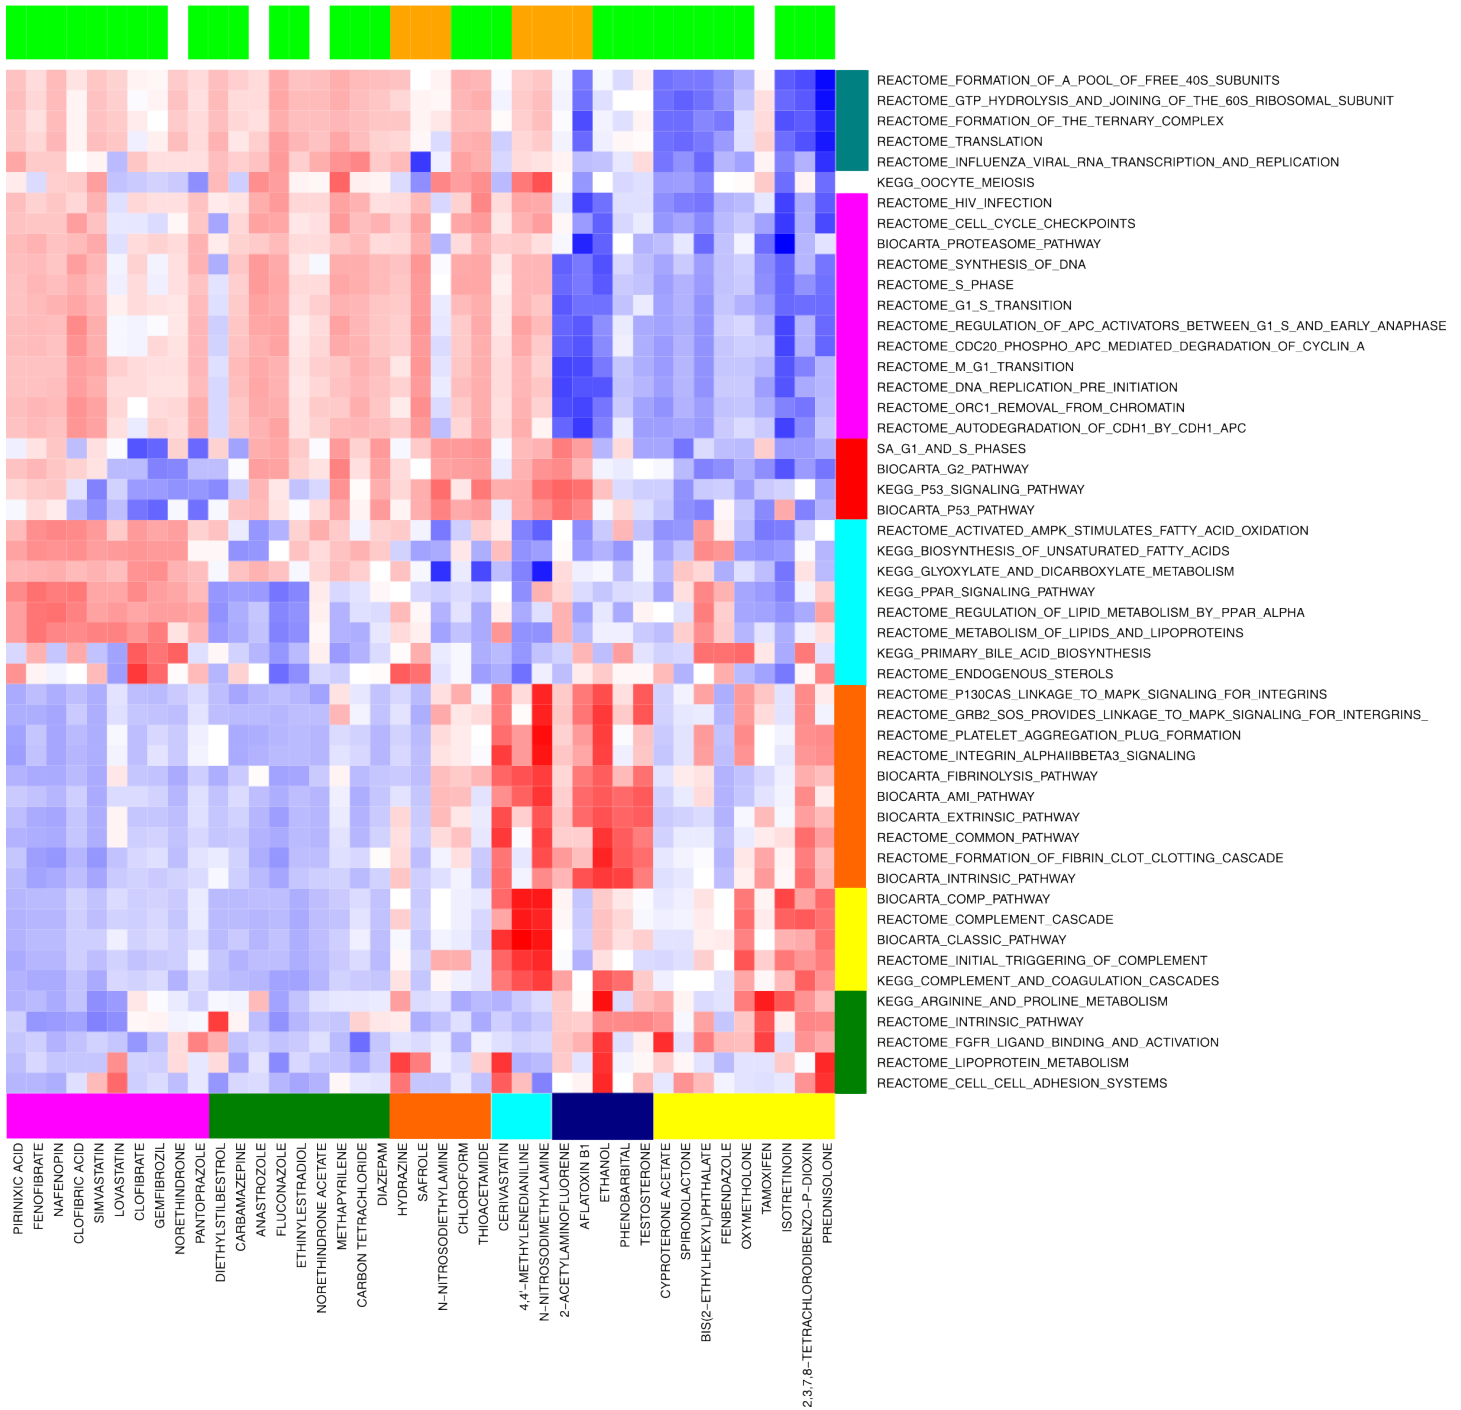

**Figure S11: Detailed Putative Modes of Action of carcinogenic chemical compounds** Heatmaps of the top 50 pathways as ranked by their variable importance derived from a random forest classifier of hepato-carcinogenicity. Rows correspond to pathways, clustered into biological processes; columns correspond to chemical compounds. The heatmap shows all carcinogenic compounds in the DrugMatrix, respectively. Only profiles corresponding to maximum duration and dose treatments, with replicates averaged, are displayed.

**Table S1 – Differential expression of carcinogens vs. non-carcinogens:** Comparison of gene expression between rats exposed to carcinogens and non-carcinogens in the Drug Matrix. Multiple replicates were averaged while controlling for the exposure time.

| Class   | FC   | 1/FC | t     | adj.P.Val | Name     | Description                                                                             |
|---------|------|------|-------|-----------|----------|-----------------------------------------------------------------------------------------|
| CARC    | 1.69 | 0.59 | 10.99 | 3.91E-21  | DACT2    | dapper, antagonist of beta-catenin, homolog 2 (Xenopus laevis)                          |
| CARC    | 1.72 | 0.58 | 10.67 | 1.95E-20  | ZDHHC2   | zinc finger, DHHC-type containing 2                                                     |
| CARC    | 1.42 | 0.7  | 9.46  | 7.37E-17  | PTER     | phosphotriesterase related                                                              |
| CARC    | 1.83 | 0.55 | 9.3   | 1.76E-16  | CIDEA    | cell death-inducing DFFA-like effector a                                                |
| CARC    | 1.38 | 0.72 | 9.12  | 5.36E-16  | ANXA7    | annexin A7                                                                              |
| CARC    | 1.58 | 0.63 | 9.06  | 7.44E-16  | HSDL2    | hydroxysteroid dehydrogenase like 2                                                     |
| CARC    | 1.78 | 0.56 | 9.04  | 8.08E-16  | ACOT1    | acyl-CoA thioesterase 1                                                                 |
| CARC    | 1.47 | 0.68 | 8.85  | 2.64E-15  | HEBP2    | heme binding protein 2                                                                  |
| CARC    | 1.52 | 0.66 | 8.72  | 5.80E-15  | MYO5B    | myosin VB                                                                               |
| CARC    | 1.41 | 0.71 | 8.52  | 2.03E-14  | PQLC3    | PQ loop repeat containing 3                                                             |
| CARC    | 1.79 | 0.56 | 8.48  | 2.55E-14  | ACOT1    | acyl-CoA thioesterase 1                                                                 |
| CARC    | 1.39 | 0.72 | 8.23  | 1.21E-13  | NUDT7    | nudix (nucleoside diphosphate linked moiety X)-type motif 7                             |
| CARC    | 1.89 | 0.53 | 8.07  | 3.20E-13  | CPT1B    | carnitine palmitoyltransferase 1B (muscle)                                              |
| CARC    | 3.99 | 0.25 | 7.96  | 6.13E-13  | ACOT1    | acyl-CoA thioesterase 1                                                                 |
| CARC    | 1.65 | 0.61 | 7.78  | 1.87E-12  | AQP7     | aquaporin 7                                                                             |
| CARC    | 1.6  | 0.62 | 7.73  | 2.49E-12  | ECI1     | enoyl-CoA delta isomerase 1                                                             |
| CARC    | 1.54 | 0.65 | 7.7   | 3.05E-12  | ME1      | malic enzyme 1, NADP(+)-dependent, cytosolic                                            |
| CARC    | 1.45 | 0.69 | 7.62  | 5.16E-12  | SNX10    | sorting nexin 10                                                                        |
| CARC    | 1.42 | 0.7  | 7.49  | 1.12E-11  | POLR3G   | polymerase (RNA) III (DNA directed) polypeptide G (32kD)                                |
| CARC    | 1.7  | 0.59 | 7.39  | 2.01E-11  | PEX11A   | peroxisomal biogenesis factor 11 alpha                                                  |
| CARC    | 1.75 | 0.57 | 7.32  | 3.03E-11  | AIG1     | androgen-induced 1                                                                      |
| CARC    | 1.35 | 0.74 | 7.29  | 3.63E-11  | CYP2J2   | cytochrome P450, family 2, subfamily J, polypeptide 2                                   |
| CARC    | 1.38 | 0.73 | 7.07  | 1.22E-10  | GNAI1    | guanine nucleotide binding protein (G protein), alpha inhibiting activity polypeptide 1 |
| CARC    | 1.65 | 0.61 | 7.06  | 1.30E-10  | PKD4     | pyruvate dehydrogenase kinase, isozyme 4                                                |
| CARC    | 1.47 | 0.68 | 6.75  | 7.67E-10  | CCND1    | cyclin D1                                                                               |
| CARC    | 1.61 | 0.62 | 6.68  | 1.08E-09  | VNN1     | vanin 1                                                                                 |
| CARC    | 1.42 | 0.7  | 6.67  | 1.15E-09  | SLC22A5  | solute carrier family 22 (organic cation/carnitine transporter), member 5               |
| CARC    | 1.37 | 0.73 | 6.66  | 1.22E-09  | TMBIM1   | transmembrane BAX inhibitor motif containing 1                                          |
| CARC    | 1.42 | 0.7  | 6.54  | 2.34E-09  | ECH1     | enoyl CoA hydratase 1, peroxisomal                                                      |
| CARC    | 1.51 | 0.66 | 6.49  | 3.12E-09  | HSPB1    | heat shock 27kDa protein 1                                                              |
| CARC    | 1.56 | 0.64 | 6.46  | 3.60E-09  | RAB30    | RAB30, member RAS oncogene family                                                       |
| CARC    | 1.42 | 0.7  | 6.37  | 5.72E-09  | CRAT     | carnitine O-acetyltransferase                                                           |
| CARC    | 1.66 | 0.6  | 6.29  | 8.63E-09  | HDC      | histidine decarboxylase                                                                 |
| CARC    | 1.37 | 0.73 | 6.1   | 2.21E-08  | SPC24    | SPC24, NDC80 kinetochore complex component, homolog (S. cerevisiae)                     |
| CARC    | 1.36 | 0.74 | 6.01  | 3.55E-08  | SLC25A30 | solute carrier family 25, member 30                                                     |
| CARC    | 1.36 | 0.73 | 5.96  | 4.66E-08  | ACSL3    | acyl-CoA synthetase long-chain family member 3                                          |
| CARC    | 1.41 | 0.71 | 5.94  | 5.06E-08  | MCM6     | minichromosome maintenance complex component 6                                          |
| NONCARC | 0.48 | 2.1  | -5.94 | 5.07E-08  | STAC3    | SH3 and cysteine rich domain 3                                                          |
| NONCARC | 0.73 | 1.36 | -6.04 | 3.11E-08  | IL1R1    | interleukin 1 receptor, type 1                                                          |
| NONCARC | 0.64 | 1.57 | -6.17 | 1.60E-08  | NOX4     | NADPH oxidase 4                                                                         |
| NONCARC | 0.7  | 1.42 | -6.21 | 1.30E-08  | FMO1     | flavin containing monooxygenase 1                                                       |
| NONCARC | 0.73 | 1.37 | -6.28 | 8.87E-09  | IL33     | interleukin 33                                                                          |
| NONCARC | 0.69 | 1.46 | -6.29 | 8.36E-09  | XPNPEP2  | X-prolyl aminopeptidase (aminopeptidase P) 2, membrane-bound                            |
| NONCARC | 0.71 | 1.4  | -6.44 | 3.83E-09  | INHBC    | inhibin, beta C                                                                         |
| NONCARC | 0.52 | 1.91 | -6.46 | 3.51E-09  | CXCL1    | chemokine (C-X-C motif) ligand 1 (melanoma growth stimulating activity, alpha)          |
| NONCARC | 0.73 | 1.37 | -7.8  | 1.71E-12  | FAM46C   | family with sequence similarity 46, member C                                            |
| NONCARC | 0.74 | 1.35 | -7.94 | 7.41E-13  | HSD3B2   | hydroxy-delta-5-steroid dehydrogenase, 3 beta- and steroid delta-isomerase 2            |
| NONCARC | 0.73 | 1.37 | -8.19 | 1.46E-13  | ARMC9    | armadillo repeat containing 9                                                           |
| NONCARC | 0.73 | 1.37 | -8.42 | 3.62E-14  | CITED2   | Cbp/p300-interacting transactivator, with Glu/Asp-rich carboxy-terminal domain, 2       |
| NONCARC | 0.64 | 1.56 | -8.44 | 3.30E-14  | CYP1A2   | cytochrome P450, family 1, subfamily A, polypeptide 2                                   |
| NONCARC | 0.68 | 1.47 | -8.48 | 2.55E-14  | LIN7A    | lin-7 homolog A (C. elegans)                                                            |
| NONCARC | 0.68 | 1.47 | -8.5  | 2.26E-14  | SLC16A10 | solute carrier family 16, member 10 (aromatic amino acid transporter)                   |
| NONCARC | 0.71 | 1.41 | -9.17 | 3.90E-16  | NTF3     | neurotrophin 3                                                                          |
| NONCARC | 0.52 | 1.92 | -9.19 | 3.77E-16  | SEZ6     | seizure related 6 homolog (mouse)                                                       |
| NONCARC | 0.39 | 2.59 | -9.91 | 3.54E-18  | A2M      | alpha-2-macroglobulin                                                                   |

**Table S2 – Differential analysis of genotoxic carcinogens vs. non-genotoxic carcinogens:** Comparison of gene expression between rats exposed to genotoxic carcinogens and non-genotoxic carcinogens in the DrugMatrix. Multiple replicates were averaged while controlling for the exposure time.

| Class    | FC   | X1.FC | t     | adj.P.Val | Name     | Description                                                                        |
|----------|------|-------|-------|-----------|----------|------------------------------------------------------------------------------------|
| CARC GT  | 1.37 | 0.73  | 6.82  | 9.02E-07  | FAM49A   | family with sequence similarity 49, member A                                       |
| CARC GT  | 1.69 | 0.59  | 6.71  | 9.02E-07  | JAM3     | junctional adhesion molecule 3                                                     |
| CARC GT  | 1.76 | 0.57  | 6.26  | 6.06E-06  | C8orf46  | chromosome 8 open reading frame 46                                                 |
| CARC GT  | 1.47 | 0.68  | 5.32  | 0.000148  | PLN      | phospholamban                                                                      |
| CARC GT  | 1.37 | 0.73  | 5.23  | 0.000188  | SDC4     | syndecan 4                                                                         |
| CARC GT  | 1.5  | 0.67  | 5.2   | 0.000203  | CAV2     | caveolin 2                                                                         |
| CARC GT  | 1.73 | 0.58  | 4.97  | 0.000402  | CDKN1A   | cyclin-dependent kinase inhibitor 1A (p21, Cip1)                                   |
| CARC GT  | 1.52 | 0.66  | 4.87  | 0.000502  | MDM2     | Mdm2, p53 E3 ubiquitin protein ligase homolog (mouse)                              |
| CARC_GT  | 1.39 | 0.72  | 4.66  | 0.000906  | NFKBIZ   | nuclear factor of kappa light polypeptide gene enhancer in B-cells inhibitor, zeta |
| CARC GT  | 1.42 | 0.7   | 4.64  | 0.000906  | EDNRB    | endothelin receptor type B                                                         |
| CARC GT  | 1.37 | 0.73  | 4.62  | 0.000927  | SULF2    | sulfatase 2                                                                        |
| CARC GT  | 1.6  | 0.62  | 4.41  | 0.001673  | CTGF     | connective tissue growth factor                                                    |
| CARC GT  | 1.35 | 0.74  | 4.35  | 0.001983  | ZFP36    | zinc finger protein 36, C3H type, homolog (mouse)                                  |
| CARC GT  | 1.45 | 0.69  | 4.33  | 0.002101  | DUSP6    | dual specificity phosphatase 6                                                     |
| CARC GT  | 1.4  | 0.71  | 4.26  | 0.002585  | HYAL3    | hyaluronoglucosaminidase 3                                                         |
| CARC GT  | 1.37 | 0.73  | 4.26  | 0.002585  | NHEJ1    | nonhomologous end-joining factor 1                                                 |
| CARC GT  | 1.39 | 0.72  | 4.12  | 0.003549  | AHR      | aryl hydrocarbon receptor                                                          |
| CARC GT  | 1.63 | 0.61  | 4.04  | 0.00428   | CYP1A2   | cytochrome P450, family 1, subfamily A, polypeptide 2                              |
| CARC GT  | 1.37 | 0.73  | 3.89  | 0.005501  | PHLDA3   | pleckstrin homology-like domain, family A, member 3                                |
| CARC GT  | 1.39 | 0.72  | 3.71  | 0.00833   | CYP3A5   | cytochrome P450, family 3, subfamily A, polypeptide 5                              |
| CARC_GT  | 1.44 | 0.7   | 3.71  | 0.00833   | SLC25A25 | solute carrier family 25 (mitochondrial carrier; phosphate carrier), member 25     |
| CARC GT  | 2.26 | 0.44  | 3.7   | 0.008475  | CYP1A1   | cytochrome P450, family 1, subfamily A, polypeptide 1                              |
| CARC GT  | 1.42 | 0.71  | 3.69  | 0.008501  | RGS2     | regulator of G-protein signaling 2, 24kDa                                          |
| CARC GT  | 1.43 | 0.7   | 3.67  | 0.008933  | TP53INP1 | tumor protein p53 inducible nuclear protein 1                                      |
| CARC GT  | 1.36 | 0.74  | 3.62  | 0.009854  | CCNG1    | cyclin G1                                                                          |
| CARC GT  | 1.74 | 0.57  | 3.61  | 0.010164  | BCL6     | B-cell CLL/lymphoma 6                                                              |
| CARC GT  | 1.75 | 0.57  | 3.57  | 0.010827  | CYP2C18  | cytochrome P450, family 2, subfamily C, polypeptide 18                             |
| CARC GT  | 1.57 | 0.64  | 3.49  | 0.012712  | BTG2     | BTG family, member 2                                                               |
| CARC GT  | 1.37 | 0.73  | 3.48  | 0.012782  | HLA-DRA  | major histocompatibility complex, class II, DR alpha                               |
| CARC GT  | 1.53 | 0.65  | 3.45  | 0.013334  | DUSP1    | dual specificity phosphatase 1                                                     |
| CARC GT  | 1.64 | 0.61  | 3.31  | 0.01764   | EGR1     | early growth response 1                                                            |
| CARC GT  | 1.63 | 0.61  | 3.21  | 0.02163   | TSKU     | tsukushi small leucine rich proteoglycan homolog (Xenopus laevis)                  |
| CARC GT  | 1.35 | 0.74  | 3.19  | 0.022342  | CCND1    | cyclin D1                                                                          |
| CARC GT  | 1.78 | 0.56  | 3.17  | 0.022968  | CYP3A5   | cytochrome P450, family 3, subfamily A, polypeptide 5                              |
| CARC GT  | 1.38 | 0.72  | 3.13  | 0.024595  | PPP1R3C  | protein phosphatase 1, regulatory subunit 3C                                       |
| CARC GT  | 1.58 | 0.63  | 3.02  | 0.03165   | SLC6A6   | solute carrier family 6 (neurotransmitter transporter, taurine), member 6          |
| CARC GT  | 1.51 | 0.66  | 2.99  | 0.033326  | CDH17    | cadherin 17, LI cadherin (liver-intestine)                                         |
| CARC GT  | 1.46 | 0.69  | 2.9   | 0.041069  | ZNF354A  | zinc finger protein 354A                                                           |
| CARC GT  | 1.46 | 0.68  | 2.89  | 0.041205  | KLF6     | Kruppel-like factor 6                                                              |
| CARC GT  | 1.43 | 0.7   | 2.86  | 0.043475  | USP2     | ubiquitin specific peptidase 2                                                     |
| CARC NGT | 0.56 | 1.77  | -2.8  | 0.049227  | AQP3     | aquaporin 3 (Gill blood group)                                                     |
| CARC NGT | 0.55 | 1.82  | -2.85 | 0.044921  | HDC      | histidine decarboxylase                                                            |
| CARC NGT | 0.66 | 1.52  | -2.91 | 0.039928  | EPHX2    | epoxide hydrolase 2, cytoplasmic                                                   |
| CARC NGT | 0.67 | 1.5   | -2.92 | 0.038885  | PRLR     | prolactin receptor                                                                 |
| CARC NGT | 0.67 | 1.49  | -3    | 0.032504  | ABHD1    | abhydrolase domain containing 1                                                    |
| CARC NGT | 0.57 | 1.75  | -3.01 | 0.03165   | CYP8B1   | cytochrome P450, family 8, subfamily B, polypeptide 1                              |
| CARC NGT | 0.52 | 1.91  | -3.1  | 0.025887  | QCCT     | glutaminyl-peptide cyclotransferase                                                |
| CARC NGT | 0.65 | 1.54  | -3.15 | 0.023538  | CRAT     | carnitine O-acetyltransferase                                                      |
| CARC NGT | 0.7  | 1.44  | -3.17 | 0.022888  | DACT2    | dapper, antagonist of beta-catenin, homolog 2 (Xenopus laevis)                     |
| CARC NGT | 0.59 | 1.71  | -3.23 | 0.020686  | PDK4     | pyruvate dehydrogenase kinase, isozyme 4                                           |
| CARC NGT | 0.56 | 1.77  | -3.3  | 0.017979  | ACOT1    | acyl-CoA thioesterase 1                                                            |
| CARC NGT | 0.63 | 1.59  | -3.31 | 0.017556  | PNPLA3   | patatin-like phospholipase domain containing 3                                     |
| CARC NGT | 0.55 | 1.82  | -3.33 | 0.016964  | EHHADH   | enoyl-CoA, hydratase/3-hydroxyacyl CoA dehydrogenase                               |
| CARC NGT | 0.64 | 1.57  | -3.39 | 0.01516   | CIDEA    | cell death-inducing DFFA-like effector a                                           |
| CARC NGT | 0.63 | 1.59  | -3.39 | 0.015132  | EC11     | enoyl-CoA delta isomerase 1                                                        |
| CARC NGT | 0.57 | 1.76  | -3.44 | 0.013334  | AQP7     | aquaporin 7                                                                        |
| CARC NGT | 0.62 | 1.62  | -3.45 | 0.013334  | HSD3B2   | hydroxy-delta-5-steroid dehydrogenase, 3 beta- and steroid delta-isomerase 2       |
| CARC NGT | 0.57 | 1.77  | -3.47 | 0.013013  | VNN1     | vanin 1                                                                            |
| CARC NGT | 0.64 | 1.56  | -3.48 | 0.012782  | MYO5B    | myosin VB                                                                          |
| CARC NGT | 0.73 | 1.38  | -3.51 | 0.012188  | DDHD1    | DDHD domain containing 1                                                           |
| CARC NGT | 0.46 | 2.16  | -3.54 | 0.011624  | CPT1B    | carnitine palmitoyltransferase 1B (muscle)                                         |
| CARC NGT | 0.63 | 1.59  | -3.54 | 0.011563  | FADS2    | fatty acid desaturase 2                                                            |
| CARC NGT | 0.68 | 1.47  | -3.55 | 0.011184  | GALE     | UDP-galactose-4-epimerase                                                          |
| CARC NGT | 0.69 | 1.45  | -3.6  | 0.010164  | NUDT7    | nudix (nucleoside diphosphate linked moiety X)-type motif 7                        |

|          |      |      |       |          |          |                                                        |
|----------|------|------|-------|----------|----------|--------------------------------------------------------|
| CARC NGT | 0.68 | 1.47 | -3.63 | 0.009674 | ABHD3    | abhydrolase domain containing 3                        |
| CARC NGT | 0.62 | 1.61 | -3.63 | 0.009674 | ANGPTL4  | angiopoietin-like 4                                    |
| CARC NGT | 0.72 | 1.39 | -3.69 | 0.008501 | TOR3A    | torsin family 3, member A                              |
| CARC NGT | 0.71 | 1.4  | -3.72 | 0.00833  | CYP2J2   | cytochrome P450, family 2, subfamily J, polypeptide 2  |
| CARC NGT | 0.72 | 1.39 | -3.72 | 0.008325 | MIOX     | myo-inositol oxygenase                                 |
| CARC NGT | 0.67 | 1.49 | -3.73 | 0.008276 | ACSM2A   | acyl-CoA synthetase medium-chain family member 2A      |
| CARC NGT | 0.66 | 1.51 | -3.73 | 0.008157 | SLC25A30 | solute carrier family 25, member 30                    |
| CARC NGT | 0.73 | 1.38 | -3.75 | 0.007972 | ACOX1    | acyl-CoA oxidase 1, palmitoyl                          |
| CARC NGT | 0.66 | 1.51 | -3.75 | 0.007972 | G6PD     | glucose-6-phosphate dehydrogenase                      |
| CARC NGT | 0.52 | 1.92 | -3.75 | 0.007972 | PEX11A   | peroxisomal biogenesis factor 11 alpha                 |
| CARC NGT | 0.62 | 1.61 | -3.85 | 0.006138 | ECH1     | enoyl CoA hydratase 1, peroxisomal                     |
| CARC NGT | 0.55 | 1.83 | -3.94 | 0.005281 | CYP4A11  | cytochrome P450, family 4, subfamily A, polypeptide 11 |
| CARC NGT | 0.59 | 1.7  | -3.96 | 0.005185 | ACSM5    | acyl-CoA synthetase medium-chain family member 5       |
| CARC NGT | 0.65 | 1.54 | -4.07 | 0.004088 | C2orf88  | chromosome 2 open reading frame 88                     |
| CARC NGT | 0.54 | 1.84 | -4.16 | 0.003376 | ACOT1    | acyl-CoA thioesterase 1                                |
| CARC NGT | 0.47 | 2.12 | -4.17 | 0.003363 | AIG1     | androgen-induced 1                                     |
| CARC NGT | 0.16 | 6.41 | -4.41 | 0.001673 | ACOT1    | acyl-CoA thioesterase 1                                |
| CARC NGT | 0.72 | 1.39 | -4.56 | 0.001063 | DECR1    | 2,4-dienoyl CoA reductase 1, mitochondrial             |
| CARC NGT | 0.67 | 1.48 | -4.7  | 0.000773 | IMPA2    | inositol(myo)-1(or 4)-monophosphatase 2                |
| CARC NGT | 0.73 | 1.36 | -4.71 | 0.00077  | CLYBL    | citrate lyase beta like                                |
| CARC NGT | 0.74 | 1.35 | -4.85 | 0.000511 | SLC22A25 | solute carrier family 22, member 25                    |
| CARC NGT | 0.55 | 1.81 | -5.4  | 0.000148 | ME1      | malic enzyme 1, NADP(+)-dependent, cytosolic           |

**Table S5 - Random forest with tissue agnostic labels:** Random forest cross-validation results using tissue agnostic class labels for genotoxicity and carcinogenicity in liver and cell culture in the DrugMatrix. Each value represents the mean and 95% confidence interval over 200 iterations of a 70%/30% train/test dataset split.

|            | LIVER<br>GenTox    | CELL CULTURE<br>GenTox | LIVER<br>Carcinogen | CELL CULTURE<br>Carcinogen |
|------------|--------------------|------------------------|---------------------|----------------------------|
| <b>AUC</b> | <b>73.64 ± 1.0</b> | <b>79.56 ± 1.0</b>     | <b>64.76 ± 1.0</b>  | <b>63.35 ± 1.2</b>         |
| ACC        | 75.3 ± 0.8         | 76.56 ± 0.8            | 61.27 ± 0.8         | 61.93 ± 1.0                |
| SENS       | 41.76 ± 1.8        | 56.77 ± 2              | 72.43 ± 1.4         | 71.91 ± 1.6                |
| SPEC       | 87.14 ± 0.8        | 86.72 ± 1.0            | 43.15 ± 2.0         | 45.24 ± 2.5                |
| PPV        | 52.65 ± 2.2        | 67.39 ± 2.2            | 70.31 ± 1.2         | 71.11 ± 1.6                |
| NPV        | 81.45 ± 1.0        | 80.62 ± 1.2            | 45.6 ± 1.6          | 46.2 ± 1.8                 |
| FDR        | 47.35 ± 2.2        | 32.61 ± 2.2            | 29.69 ± 1.2         | 28.89 ± 1.6                |

**Table S6: Prediction using tissue-specific labels:** Random forest cross-validation results for genotoxicity and carcinogenicity in liver and cell culture in the DrugMatrix. Each value represents the mean and 95% confidence interval over 200 iterations of a 70%/30% train/test dataset split.

|            | LIVER<br>GenoToxicity | LIVER<br>Carcinogenicity |
|------------|-----------------------|--------------------------|
| #Samples   | 1260                  | 1221                     |
| #Chemicals | 130                   | 127                      |
| <b>AUC</b> | <b>75.08 ± 1.2</b>    | <b>76.73 ± 1.0</b>       |
| ACC        | 75.62 ± 0.8           | 72.95 ± 0.8              |
| SENS       | 42.82 ± 2.2           | 56.78 ± 1.8              |
| SPEC       | 87.25 ± 0.8           | 82.91 ± 1.0              |

|     |             |             |
|-----|-------------|-------------|
| PPV | 52.79 ± 2.4 | 66.61 ± 1.8 |
| NPV | 81.88 ± 1.0 | 76.37 ± 1.2 |
| FDR | 47.21 ± 2.4 | 33.39 ± 1.8 |

**Table S7 – Prediction with tissue specific labels using SVM:** Support Vector Machine (SVM) cross-validation results for genotoxicity and carcinogenicity in liver and cell culture in the DrugMatrix. Each value represents the mean and 95% confidence interval over 200 iterations of a 70%/30% train/test dataset split.

|            | LIVER<br>GenTox    | CELL CULTURE<br>GenTox | LIVER<br>Carcinogen_liv | CELL CULTURE<br>Carcinogen_liv |
|------------|--------------------|------------------------|-------------------------|--------------------------------|
| <b>AUC</b> | <b>65.63 ± 4.3</b> | <b>75.15 ± 5.5</b>     | <b>61.31 ± 4.1</b>      | <b>56.4 ± 7.3</b>              |
| ACC        | 73.05 ± 3.3        | 78.83 ± 4.7            | 63.94 ± 3.7             | 65.99 ± 5.5                    |
| SENS       | 49.42 ± 8.8        | 63.24 ± 11.6           | 50.16 ± 8.4             | 35.14 ± 14.9                   |
| SPEC       | 81.83 ± 4.1        | 87.06 ± 6.3            | 72.46 ± 5.9             | 77.65 ± 6.5                    |
| PPV        | 48.3 ± 10.6        | 70.34 ± 12.5           | 50.6 ± 9.6              | 35.4 ± 13.1                    |
| NPV        | 82.15 ± 5.5        | 83.07 ± 6.1            | 71.97 ± 6.5             | 76.97 ± 7.1                    |
| FDR        | 51.7 ± 10.8        | 29.66 ± 12.5           | 49.4 ± 9.6              | 64.6 ± 13.1                    |

**Table S8 - Prediction with tissue specific labels using PAMR:** Shrunken centroid (PAMR) cross-validation results for genotoxicity and carcinogenicity in liver and cell culture in the DrugMatrix. Each value represents the mean and 95% confidence interval over 200 iterations of a 70%/30% train/test dataset split.

|            | LIVER<br>GenTox    | CELL CULTURE<br>GenTox | LIVER<br>Carcinogen_liv | CELL CULTURE<br>Carcinogen_liv |
|------------|--------------------|------------------------|-------------------------|--------------------------------|
| <b>AUC</b> | <b>70.36 ± 1.0</b> | <b>76.73 ± 1.2</b>     | <b>77.3 ± 0.8</b>       | <b>58.79 ± 1.8</b>             |
| ACC        | 73.22 ± 0.8        | 75.69 ± 1.0            | 72.66 ± 0.8             | 66.59 ± 1.2                    |
| SENS       | 16.11 ± 1.4        | 47.36 ± 2.2            | 53.29 ± 1.6             | 21.53 ± 2.2                    |
| SPEC       | 93.87 ± 0.8        | 90.64 ± 1.4            | 84.4 ± 0.8              | 86.76 ± 1.4                    |
| PPV        | 53.02 ± 3.3        | 74.97 ± 2.7            | 66.45 ± 1.8             | 43.97 ± 3.7                    |
| NPV        | 76.03 ± 1.0        | 77.67 ± 1.2            | 75.31 ± 1.2             | 71.93 ± 1.4                    |
| FDR        | 46.98 ± 3.3        | 25.03 ± 2.7            | 33.55 ± 1.8             | 56.03 ± 3.7                    |

**Table S9 - Prediction with tissue specific labels using structural features alone:** Random forest cross-validation results for genotoxicity and carcinogenicity in liver and cell culture in the DrugMatrix based on structural features. Each value represents the mean and 95% confidence interval over 200 iterations of a 70%/30% train/test dataset split.

|            | LIVER<br>GenTox    | CELL CULTURE<br>GenTox | LIVER<br>Carcinogen_liv | CELL CULTURE<br>Carcinogen_liv |
|------------|--------------------|------------------------|-------------------------|--------------------------------|
| <b>AUC</b> | <b>70.94 ± 4.1</b> | <b>85.59 ± 2.2</b>     | <b>59.89 ± 8.8</b>      | <b>54.68 ± 9.2</b>             |

|      |              |              |              |              |
|------|--------------|--------------|--------------|--------------|
| ACC  | 82.33 ± 2.2  | 73.09 ± 14.1 | 56.72 ± 3.1  | 58.65 ± 5.1  |
| SENS | 44.91 ± 12.7 | 93.75 ± 12.2 | 30.58 ± 9.4  | 25 ± 29.4    |
| SPEC | 96.4 ± 2.9   | 68.72 ± 16.1 | 73.63 ± 16.5 | 76.84 ± 32.9 |
| PPV  | 83.01 ± 9.2  | 46.1 ± 34.3  | 42.7 ± 16.5  | 35 ± 29.4    |
| NPV  | 82.42 ± 4.1  | 96.51 ± 6.9  | 63.28 ± 5.9  | 71.12 ± 17.4 |
| FDR  | 16.99 ± 9.2  | 53.9 ± 34.3  | 57.3 ± 16.5  | 65 ± 29.4    |

**Table S10 - Prediction with tissue specific labels using gene expression and structural features:** Random forest cross-validation results for genotoxicity and carcinogenicity in liver and cell culture in the DrugMatrix based on structural features and gene expression profiles. Each value represents the mean and 95% confidence interval over 200 iterations of a 70%/30% train/test dataset split.

|            | LIVER<br>GenTox    | CELL CULTURE<br>GenTox | LIVER<br>Carcinogen_liv | CELL CULTURE<br>Carcinogen_liv |
|------------|--------------------|------------------------|-------------------------|--------------------------------|
| <b>AUC</b> | <b>80.11 ± 1.8</b> | <b>79.76 ± 1.8</b>     | <b>77.74 ± 1.4</b>      | <b>65.22 ± 2.2</b>             |
| ACC        | 81.39 ± 1.2        | 75.7 ± 1.4             | 72.61 ± 1.0             | 68.08 ± 1.4                    |
| SENS       | 53.33 ± 3.5        | 59.78 ± 3.1            | 59.63 ± 2.7             | 29.62 ± 3.3                    |
| SPEC       | 91.05 ± 1.2        | 84.13 ± 1.8            | 81.4 ± 1.6              | 84.87 ± 2.0                    |
| PPV        | 67.37 ± 3.3        | 64.12 ± 3.5            | 66.12 ± 2.5             | 45.93 ± 4.5                    |
| NPV        | 85.16 ± 1.4        | 81.75 ± 1.8            | 76.84 ± 1.8             | 74.18 ± 1.8                    |
| FDR        | 32.63 ± 3.3        | 35.88 ± 3.5            | 33.88 ± 2.5             | 54.07 ± 4.5                    |

**Table S11: Prediction results on TG-GATEs of a model trained on the DrugMatrix:** Random forest classification results including the 95% confidence interval for carcinogenicity in liver, based on genes and pathways. The model was trained on the DrugMatrix and tested on TG-GATEs.

|            | Genes              | Pathways           |
|------------|--------------------|--------------------|
| #Samples   | 2064               | 2064               |
| #Chemicals | 47                 | 47                 |
| <b>AUC</b> | <b>76.64 ± 1.8</b> | <b>78.50 ± 1.8</b> |
| ACC        | 81.62 ± 1.8        | 80.56 ± 1.8        |
| SENS       | 37.36 ± 2.2        | 48.48 ± 2.2        |
| SPEC       | 98.25 ± 0.6        | 92.57 ± 1.2        |
| PPV        | 88.89 ± 1.4        | 70.97 ± 2.0        |
| NPV        | 80.68 ± 1.8        | 82.75 ± 1.6        |
| FDR        | 11.11 ± 1.4        | 29.03 ± 2.0        |

**Table S12 - Cross-validation results in the TG-GATEs dataset:** Random forest cross-validation results for carcinogenicity in liver, based on genes and pathways in the TG-GATEs dataset. Each value represents the mean and 95% confidence interval over 200 iterations of a 70%/30% train/test dataset split.

|            | Genes              | Pathways          |
|------------|--------------------|-------------------|
| <b>AUC</b> | <b>82.67 ± 1.0</b> | <b>80.6 ± 0.8</b> |
| ACC        | 80.07 ± 0.8        | 78.99 ± 0.6       |
| SENS       | 63.35 ± 1.8        | 56.72 ± 1.6       |
| SPEC       | 90.22 ± 0.8        | 91.75 ± 0.6       |
| PPV        | 78.88 ± 1.6        | 78.93 ± 1.4       |
| NPV        | 80.99 ± 1.0        | 79 ± 1.0          |
| FDR        | 21.12 ± 1.6        | 21.07 ± 1.4       |

**Table S13 – Classification performance with and without dose specific annotation:** Random forest cross-validation results for carcinogenicity in liver, based on genes and pathways in the TG-GATEs dataset. Classification results of both dose-specific and -unspecific carcinogenicity labels are included. Each value represents the mean and 95% confidence interval over 200 iterations of a 70%/30% train/test dataset split.

|      | Dose dependent | Dose Independent |
|------|----------------|------------------|
| AUC  | 82.67 ± 1.0    | 69.26 +/- 0.9    |
| ACC  | 80.07 ± 0.8    | 80.9 +/- 0.4     |
| SENS | 63.35 ± 1.8    | 31.97 +/- 1.3    |
| SPEC | 90.22 ± 0.8    | 93.06 +/- 0.6    |
| PPV  | 78.88 ± 1.6    | 52.26 +/- 1.5    |
| NPV  | 80.99 ± 1.0    | 84.99 +/- 0.5    |
| FDR  | 21.12 ± 1.6    | 47.74 +/- 1.5    |

**Table S14- Gene set projection of the DrugMatrix samples:** Random forest cross-validation results for tissue genotoxicity and carcinogenicity in liver and cell culture based on pathway projected profiles in the DrugMatrix. Each value represents the mean and 95% confidence interval over 200 iterations of a 70%/30% train/test dataset split.

|      | LIVER<br>GenTox | CELL CULTURE<br>GenTox | LIVER<br>Carcinogen_liv | CELL CULTURE<br>Carcinogen_liv |
|------|-----------------|------------------------|-------------------------|--------------------------------|
| AUC  | 68.32 ± 1.0     | 79.86 ± 1.2            | 73.27 ± 0.8             | 64.87 ± 1.4                    |
| ACC  | 72.62 ± 0.8     | 78.36 ± 1.0            | 71.52 ± 0.7             | 66.19 ± 1.0                    |
| SENS | 27.54 ± 1.7     | 59.2 ± 2.0             | 51.96 ± 1.6             | 38.11 ± 2.5                    |
| SPEC | 88.9 ± 0.8      | 88.53 ± 1.2            | 83.91 ± 0.9             | 78.82 ± 1.3                    |
| PPV  | 46.76 ± 2.1     | 72.22 ± 2.3            | 66.33 ± 1.8             | 43.06 ± 2.4                    |
| NPV  | 77.95 ± 1.1     | 81.51 ± 1.2            | 74.08 ± 1.1             | 75.23 ± 1.3                    |
| FDR  | 53.24 ± 2.1     | 27.78 ± 2.3            | 33.67 ± 1.8             | 56.94 ± 2.4                    |



**Table S15 – Comparison with published signatures:** Comparison of classification results for tissue carcinogenicity in liver. The random forest model is compared to two published signatures that were tested with a support vector machine. The first three columns show models trained on the DrugMatrix and tested on TG-GATEs, while the fourth column shows the mean over 200 iterations of a 70%/30% train/test dataset split of the non-genotoxic compounds in the DrugMatrix.

|      | Random Forest | Ellinger-Ziegelbauer 2008 | Fielden 2011 | Fielden 2011 (Non-GT) |
|------|---------------|---------------------------|--------------|-----------------------|
| AUC  | 76.64         | 61.75                     | 69.56        | 62.59 ± 0.6           |
| ACC  | 81.62         | 71.57                     | 83.05        | 66.16 ± 1.0           |
| SENS | 37.36         | 40.11                     | 39.84        | 37.76 ± 2.0           |
| SPEC | 98.25         | 83.38                     | 99.28        | 87.42 ± 1.1           |
| PPV  | 88.89         | 47.56                     | 95.39        | 67.49 ± 2.3           |
| NPV  | 80.68         | 78.75                     | 81.46        | 67.99 ± 1.5           |
| FDR  | 11.11         | 52.44                     | 4.61         | 32.51 ± 2.2           |

**Table S16 - Testing different numbers of features using a variance filter:** Random forest cross-validation results for carcinogenicity in liver using different numbers of features, based on variance ranking. Each value represents the mean and 95% confidence interval over 200 iterations of a 70%/30% train/test dataset split in the DrugMatrix.

|            | 200 Genes       | 500 Genes         | 1000 Genes         | 2000 Genes        |
|------------|-----------------|-------------------|--------------------|-------------------|
| <b>AUC</b> | <b>76 ± 0.8</b> | <b>76.1 ± 0.8</b> | <b>75.50 ± 0.8</b> | <b>75.8 ± 1.0</b> |
| ACC        | 72 ± 0.8        | 72.8 ± 0.8        | 72.50 ± 0.8        | 72.5 ± 0.8        |
| SENS       | 52.2 ± 1.8      | 52.1 ± 1.8        | 51.30 ± 1.6        | 54.1 ± 1.8        |
| SPEC       | 83.8 ± 1.2      | 85.00 ± 1.0       | 84.90 ± 1.0        | 83.4 ± 1.2        |
| PPV        | 64.1 ± 2.0      | 66.00 ± 2.0       | 66.40 ± 1.8        | 64.3 ± 2.0        |
| NPV        | 76.2 ± 1.2      | 75.60 ± 1.2       | 75.40 ± 1.2        | 76.8 ± 1.2        |
| FDR        | 35.9 ± 2.0      | 34.00 ± 2.0       | 33.60 ± 1.8        | 35.6 ± 2.0        |

**Table S17 – Testing different numbers of features using differential expression:** Random forest cross-validation results for carcinogenicity in liver using different numbers of features, based on differential expression ranking. Each value represents the mean and 95% confidence interval over 200 iterations of a 70%/30% train/test dataset split in the DrugMatrix.

|            | 200 Genes         | 500 Genes         | 1000 Genes        | 2000 Genes        |
|------------|-------------------|-------------------|-------------------|-------------------|
| <b>AUC</b> | <b>75.2 ± 0.8</b> | <b>75.4 ± 0.8</b> | <b>74.8 ± 0.8</b> | <b>74.3 ± 0.8</b> |
| ACC        | 73 ± 0.8          | 73.1 ± 0.8        | 72.3 ± 0.8        | 72 ± 0.8          |
| SENS       | 51.3 ± 1.8        | 53.6 ± 1.6        | 50.4 ± 1.8        | 48.5 ± 1.8        |
| SPEC       | 85.3 ± 0.8        | 84.2 ± 1.0        | 85.1 ± 1.0        | 86 ± 1.0          |
| PPV        | 65.7 ± 1.8        | 64.8 ± 1.8        | 65.6 ± 1.8        | 66.3 ± 1.8        |
| NPV        | 76 ± 1.2          | 77 ± 1.0          | 75.3 ± 1.2        | 74.5 ± 1.2        |

|     |            |            |            |            |
|-----|------------|------------|------------|------------|
| FDR | 34.3 ± 1.8 | 35.2 ± 1.8 | 34.4 ± 1.8 | 33.7 ± 1.8 |
|-----|------------|------------|------------|------------|

**Table S18 – Prediction results with lower variance features:** Random forest cross-validation results for carcinogenicity in liver using 500 features with decreasing variance. Each value represents the mean and 95% confidence interval over 200 iterations of a 70%/30% train/test dataset split in the DrugMatrix.

|      | Features 1-500     | Features 501-1000  | Features 1001-1500 |
|------|--------------------|--------------------|--------------------|
| AUC  | <b>77.74 ± 1.4</b> | <b>75.16 ± 0.8</b> | <b>74.58 ± 0.8</b> |
| ACC  | 72.61 ± 1.0        | 72.09 ± 0.8        | 71.95 ± 0.8        |
| SENS | 59.63 ± 2.7        | 53.16 ± 1.8        | 53.04 ± 1.8        |
| SPEC | 81.4 ± 1.6         | 83.63 ± 1.0        | 83.7 ± 1.0         |
| PPV  | 66.12 ± 2.5        | 65.29 ± 2.0        | 66.17 ± 1.8        |
| NPV  | 76.84 ± 1.8        | 75.55 ± 1.2        | 75.09 ± 1.2        |
| FDR  | 33.88 ± 2.5        | 34.71 ± 2.0        | 33.83 ± 1.8        |

**Table S20 – Samples in Drugmatrix with carcinogenicity annotation:** Overview of samples in the DrugMatrix with either carcinogenicity or genotoxicity annotation, according to tissue type.

|                | LIVER | CELL CULTURE | KIDNEY | HEART | THIGH MUSCLE | All  |
|----------------|-------|--------------|--------|-------|--------------|------|
| All samples    | 2195  | 813          | 1410   | 862   | 158          | 5438 |
| Untreated      | 279   | 113          | 335    | 231   | 36           | 994  |
| Treated        | 1916  | 700          | 1075   | 631   | 122          | 4444 |
| Non-Genotoxic  | 942   | 362          | 463    | 339   | 77           | 2183 |
| Genotoxic      | 318   | 171          | 245    | 125   | 77           | 936  |
| Non-Carcinogen | 765   | 341          | 51     | /     | /            | 1157 |
| Carcinogen     | 456   | 141          | 51     | /     | /            | 648  |
| Compounds      | 199   | 104          | 139    | 88    | 21           | 551  |

**Table S21– Samples in TG-GATEs:** Overview of samples in the TG-GATEs with either carcinogenicity or genotoxicity annotation, according to tissue type.

|             | Liver  |        |                 | Kidney |        |
|-------------|--------|--------|-----------------|--------|--------|
|             | single | repeat | <i>in-vitro</i> | single | Repeat |
| All samples | 6264   | 6249   | 3140            | 1872   | 1856   |
| Untreated   | 1572   | 1572   | 768             | 468    | 468    |
| # Compounds | 131    | 131    | 131             | 39     | 39     |

**Table S22 – Overlapping compounds between TG-GATEs and DrugMatrix:** Overview of 25 compounds that were both tested in the TG-GATEs and DrugMatrix, showing the differences in treatment doses.

|                      | TG-GATEs doses (mg/kg) |      |      |  | DrugMatrix doses (mg/kg) |      |     |     |
|----------------------|------------------------|------|------|--|--------------------------|------|-----|-----|
|                      |                        |      |      |  |                          |      |     |     |
| acetaminophen        | 300                    | 600  | 1000 |  | 100                      | -    | -   | -   |
| allyl alcohol        | 3                      | 10   | 30   |  | 16                       | 25   | 32  | -   |
| aspirin              | 45                     | 150  | 450  |  | 35                       | 167  | 375 | -   |
| carbamazepine        | 30                     | 100  | 300  |  | 490                      | -    | -   | -   |
| carbon tetrachloride | 30                     | 100  | 300  |  | 400                      | 1175 | -   | -   |
| clofibrate           | 30                     | 100  | 300  |  | 130                      | 500  | -   | -   |
| clomipramine         | 10                     | 30   | 100  |  | 115                      | -    | -   | -   |
| diazepam             | 25                     | 75   | 250  |  | 710                      | -    | -   | -   |
| diclofenac           | 1                      | 3    | 10   |  | 10                       | -    | -   | -   |
| ethanol              | 400                    | 1200 | 4000 |  | 6000                     | -    | -   | -   |
| fenofibrate          | 10                     | 100  | 1000 |  | 43                       | 100  | 215 | 430 |
| gemfibrozil          | 30                     | 100  | 300  |  | 100                      | 700  | -   | -   |
| indomethacin         | 0.5                    | 1.6  | 5    |  | 12                       | -    | -   | -   |
| ketoconazole         | 10                     | 30   | 100  |  | 114                      | 227  | -   | -   |
| meloxicam            | 3                      | 10   | 30   |  | 33                       | -    | -   | -   |
| methapyrilene        | 10                     | 30   | 100  |  | 100                      | -    | -   | -   |
| methimazole          | 10                     | 30   | 100  |  | 100                      | -    | -   | -   |
| naproxen             | 6                      | 20   | 60   |  | 10                       | -    | -   | -   |
| phenobarbital        | 10                     | 30   | 100  |  | 25                       | 54   | -   | -   |
| promethazine         | 20                     | 60   | 200  |  | 2.3                      | 113  | -   | -   |
| propylthiouracil     | 10                     | 30   | 100  |  | 625                      |      | -   | -   |
| simvastatin          | 40                     | 120  | 400  |  | 15                       | 1200 | -   | -   |
| tamoxifen            | 6                      | 20   | 60   |  | 2.5                      | 64   | -   | -   |
| thioacetamide        | 4.5                    | 15   | 45   |  | 200                      |      | -   | -   |
| valproic acid        | 45                     | 150  | 450  |  | 1340                     | 1500 | -   | -   |

**Table S30– Performance measurements:** Equations to calculate the performance measurements. True Positive (TP), True Negative (TN), False Positive (FP), False Negative (FN)

|                                        |                         |
|----------------------------------------|-------------------------|
| <b>Accuracy</b>                        | $(TP+TN)/(TP+TN+FP+FN)$ |
| <b>Sensitivity</b>                     | $TP / (TP+FN)$          |
| <b>Specificity</b>                     | $TN / (TN + FP)$        |
| <b>Positive Predictive Value (PPV)</b> | $TP / (TP+FP)$          |
| <b>Negative Predictive Value (NPV)</b> | $TN / (TN + FN)$        |
| <b>False Discovery Rate (FDR)</b>      | $FP/ (TP+FP)$           |
